# Supplementary material
Source: PubMed Central journal article supplement (PMC5987275)
Supplement: supplementary_material(1).pdf [file supplementary_material%281%29.pdf]

## Supplementary material

**Table S-1:** Composition of specific dimensions of mood

| Cheerfulness | Relaxation          | Activation    | Sedation    | Anxiety   |
|--------------|---------------------|---------------|-------------|-----------|
| Buoyant      | Easygoing           | High-spirited | Muddled     | Worried   |
| Gleeful      | Relaxed             | Active        | Woozy       | Concerned |
| Happy        | Well-balanced       | Powerful      | Limp        | Anxious   |
| Cheerful     | In a chilled manner | Overexcited   | Inattentive | Excited   |
| Optimistic   | Calm                | Talkative     | Slowed down | Nervous   |

The dimensions of the moods cheerfulness, relaxation, activation, sedation and anxiety were described by five adjectives each. The questionnaire rated every adjective on a 10-point scale.

**Table S-2:** Basic characteristics.

|                                       | CURP<br>(n = 46) | CERP<br>(n = 36) | Total<br>(n = 82) | p                 |
|---------------------------------------|------------------|------------------|-------------------|-------------------|
| Demographic data                      |                  |                  |                   |                   |
| Age (years) mean $\pm$ SD             | 56 $\pm$ 17      | 57 $\pm$ 15      | 56 $\pm$ 16       | .846 <sup>b</sup> |
| Female sex, n (%)                     | 22 (48)          | 16 (44)          | 38 (46)           | .761 <sup>a</sup> |
| Graduation, n (%)                     | 45               | 34               | 79                | .759 <sup>a</sup> |
| Low level                             | 28 (62)          | 20 (59)          | 48 (61)           |                   |
| High level                            | 17 (38)          | 14 (41)          | 31 (39)           |                   |
| Center Hanover/Bochum                 | 26/20            | 17/19            | 43/39             |                   |
| Partner relationship, n (%)           | 44               | 34               | 78                | .474 <sup>a</sup> |
| Single                                | 11 (25)          | 11 (32)          | 22 (28)           |                   |
| In partnership                        | 33 (75)          | 23 (68)          | 56 (72)           |                   |
| Smoking, n (%)                        | 44               | 35               | 79                | .772 <sup>a</sup> |
| Current smokers                       | 9 (20)           | 8 (23)           | 17 (22)           |                   |
| Ex-smokers                            | 9 (20)           | 5 (14)           | 14 (18)           |                   |
| Never-smokers                         | 26 (59)          | 22 (63)          | 48 (61)           |                   |
| Alcohol, n (%)                        | 38               | 33               | 71                | .611 <sup>a</sup> |
| Excessive alcohol consumption         | 6 (16)           | 8 (24)           | 14 (20)           |                   |
| Normal alcohol consumption            | 21 (55)          | 15 (45)          | 36 (51)           |                   |
| No alcohol consumption                | 11 (29)          | 10 (30)          | 21 (30)           |                   |
| Medication and comorbidity            |                  |                  |                   |                   |
| Analgesics                            | 42               | 32               | 74                |                   |
| n (%)                                 | 21 (50)          | 16 (50)          | 37 (50)           | 1 <sup>a</sup>    |
| Hypnotics                             | 39               | 30               | 69                |                   |
| n (%)                                 | 5 (13)           | 4 (13)           | 9 (13)            | .95 <sup>a</sup>  |
| Tranquilizers                         | 38               | 29               | 67                |                   |
| n (%)                                 | 4 (11)           | 1 (3)            | 5 (7)             | .275 <sup>a</sup> |
| At least one hypnotic or tranquilizer | 39               | 29               | 68                |                   |
| n (%)                                 | 8 (21)           | 4 (14)           | 12 (18)           | .472 <sup>a</sup> |
| Antidepressants                       | 39               | 29               | 68                |                   |

|                                                    |         |         |         |                   |
|----------------------------------------------------|---------|---------|---------|-------------------|
| n (%)                                              | 2 (5)   | 4 (14)  | 6 (9)   | .213 <sup>a</sup> |
| Neuroleptics                                       | 37      | 28      | 65      |                   |
| n (%)                                              | 2 (5)   | 2 (7)   | 4 (6)   | .773 <sup>a</sup> |
| At least one psychotropic drug                     | 37      | 28      | 65      |                   |
| n (%)                                              | 3 (8)   | 4 (14)  | 7 (11)  | .426 <sup>a</sup> |
| Other drugs (e.g. cardiological, endocrinological) | 23      | 21      | 44      |                   |
| n (%)                                              | 14 (61) | 12 (57) | 26 (59) | .802 <sup>a</sup> |
| At least one premedication                         | 36      | 30      | 66      |                   |
| n (%)                                              | 30 (83) | 25 (83) | 55 (83) | 1 <sup>a</sup>    |
| Comorbidity, n (%)                                 | 30      | 25      | 55      |                   |
| At least one comorbidity                           | 21 (70) | 17 (68) | 38 (69) | .873 <sup>a</sup> |
| ASA, n (%)                                         | 37      | 28      | 65      | .918 <sup>a</sup> |
| 1                                                  | 16 (43) | 11 (39) | 27 (42) |                   |
| 2                                                  | 14 (38) | 12 (43) | 26 (40) |                   |
| ≥3                                                 | 7 (19)  | 5 (18)  | 12 (18) |                   |

Basic characteristics. CURP: cluster of uneasy reaction pattern, CERP: cluster of euphoric reaction pattern, a:  $\chi^2$  test, b: t-test. Basic demographic data, medication and comorbidity did not differ between study groups.

**Table S-3: Medication use**

| Characteristic                | Total<br>(n = 82) | CURP<br>(n = 46) | CERP<br>(n = 36) | p    | a: $\chi^2$ test |
|-------------------------------|-------------------|------------------|------------------|------|------------------|
|                               |                   |                  |                  |      | b: t-test        |
| <b>Medication</b>             |                   |                  |                  |      |                  |
| <b>Analgesics, n (%)</b>      | 74                | 42               | 32               | .879 | a                |
| Never                         | 37 (50)           | 21 (50)          | 16 (50)          |      |                  |
| Less than once a week         | 16 (22)           | 9 (21)           | 7 (22)           |      |                  |
| Once a week                   | 5 (7)             | 3 (7)            | 2 (6)            |      |                  |
| Several times a week          | 9 (12)            | 4 (10)           | 5 (16)           |      |                  |
| Daily                         | 7 (9)             | 5 (12)           | 2 (6)            |      |                  |
| <b>Soporifics, n (%)</b>      | 69                | 39               | 30               | .512 | a                |
| Never                         | 60 (87)           | 34 (87)          | 26 (87)          |      |                  |
| Less than once a week         | 4 (6)             | 3 (8)            | 1 (3)            |      |                  |
| Once a week                   | --                | 1 (3)            | --               |      |                  |
| Several times a week          | 3 (4)             | 1 (3)            | 2 (7)            |      |                  |
| Daily                         | 1 (1)             | --               | 1 (3)            |      |                  |
| <b>Tranquilizer, n (%)</b>    | 67                | 38               | 29               | .629 | a                |
| Never                         | 62 (93)           | 34 (89)          | 28 (97)          |      |                  |
| Less than once a week         | --                | 1 (3)            | --               |      |                  |
| Several times a week          | 3 (4)             | 2 (5)            | 1 (3)            |      |                  |
| Daily                         | --                | 1 (3)            | --               |      |                  |
| <b>Antidepressants, n (%)</b> | 68                | 39               | 29               | .35  | a                |
| Never                         | 62 (91)           | 37 (95)          | 25 (86)          |      |                  |
| Less than once a week         | 1 (1)             | --               | 1 (3)            |      |                  |
| Daily                         | 5 (7)             | 2 (5)            | 3 (10)           |      |                  |
| <b>Neuroleptics, n (%)</b>    | 65                | 37               | 28               | .773 | a                |
| No                            | 61 (94)           | 35 (95)          | 26 (93)          |      |                  |
| Yes                           | 4 (6)             | 2 (5)            | 2 (7)            |      |                  |

| Other drugs, n (%)   | 44      | 23      | 21      | .529 | a |
|----------------------|---------|---------|---------|------|---|
| Never                | 18 (41) | 9 (39)  | 9 (43)  |      |   |
| Several times a week | 1 (2)   | --      | 1 (5)   |      |   |
| Daily                | 25 (57) | 14 (61) | 11 (52) |      |   |

**Table S-4: Experience with prior short anesthesia**

| Characteristic                                                   | CURP<br>(n = 46) | CERP<br>(n = 36) | total<br>(n = 82) | p    |
|------------------------------------------------------------------|------------------|------------------|-------------------|------|
| Experience with prior short anesthesia                           | 44               | 34               | 78                |      |
| At least one short anesthesia in the last five years             | 32 (73)          | 24 (71)          | 56 (72)           | .835 |
| Short anesthesia, n (%)                                          | 36               | 28               | 64                |      |
| With propofol                                                    | 15 (42)          | 11 (39)          | 26 (41)           | .773 |
| With midazolam                                                   | 3 (8)            | 4 (14)           | 7 (11)            | .515 |
| Combination of propofol and midazolam                            | 4 (11)           | 1 (4)            | 5 (8)             | .264 |
| Reminiscence of the mood before the last short anesthesia, n (%) | 28               | 23               | 51                | .473 |
| More depressed/anxious                                           | 15 (54)          | 10 (43)          | 25 (49)           |      |
| More confident/high-spirited                                     | 13 (46)          | 13 (57)          | 26 (51)           |      |
| Mean $\pm$ SD                                                    | 6.7 $\pm$ 2.4    | 6.0 $\pm$ 2.5    | 6.4 $\pm$ 2.5     | .362 |
| Reminiscence of the mood after the last short anesthesia, n (%)  | 27               | 22               | 49                | .74  |
| More depressed/anxious                                           | 11 (41)          | 10 (45)          | 21 (43)           |      |
| More confident/high-spirited                                     | 16 (59)          | 12 (55)          | 28 (57)           |      |
| Mean $\pm$ SD                                                    | 7.8 $\pm$ 2.0    | 7.5 $\pm$ 2.2    | 7.6 $\pm$ 2.1     | .595 |

**Table S-5:** Perception of the endoscopy’s result

| Survey after short anesthesia (t2)             | Total   | CURP   | CERP    | P     |                  |
|------------------------------------------------|---------|--------|---------|-------|------------------|
| Patient knows diagnosis after endoscopy, n (%) | 38      | 17     | 21      | .013* | a: $\chi^2$ test |
| Positive (good) diagnosis                      | 27 (71) | 8 (47) | 19 (90) |       |                  |
| Prefer not to say                              | 5 (13)  | 4 (24) | 1 (5)   |       |                  |
| Unknown                                        | 6 (16)  | 5 (29) | 1 (5)   |       |                  |

**Table S-6: Overall development of mood**

| Survey at time point             | t1            | t2            | t3            | p        |          |          | a: $\chi^2$ test |
|----------------------------------|---------------|---------------|---------------|----------|----------|----------|------------------|
|                                  |               |               |               | t1 vs t2 | t2 vs t3 | t1 vs t3 | b: t-test        |
| Worried before endoscopy, n      | 78            | --            | 60            |          |          |          |                  |
| Not worried, n (%)               | 36 (46)       | --            | 27 (45)       | --       | --       | .893     | a                |
| Worried, n (%)                   | 42 (54)       | --            | 33 (55)       |          |          |          |                  |
| Mean $\pm$ SD                    | 7.0 $\pm$ 2.8 | --            | 7.8 $\pm$ 2.4 | --       | --       | .078     | b                |
| Mood before / after endoscopy, n | 77            | 78            | 60            |          |          |          |                  |
| More depressed/anxious, n (%)    | 35 (45)       | 34 (44)       | 31 (52)       | .815     | .346     | .47      | a                |
| More confident/cheerful, n (%)   | 42 (55)       | 44 (56)       | 29 (48)       |          |          |          |                  |
| Mean $\pm$ SD                    | 6.6 $\pm$ 2.4 | 8.2 $\pm$ 2.2 | 6.5 $\pm$ 2.7 | 0*       | 0*       | .877     | b                |
| Index of euphoria, n             | 82            | 82            | 60            |          |          |          |                  |
| Mean $\pm$ SD                    | 4.6 $\pm$ 2.0 | 5.8 $\pm$ 1.9 | 6.2 $\pm$ 2.0 | 0*       | .228     | 0*       | b                |
| Index of unease, n               | 82            | 82            | 60            |          |          |          |                  |
| Mean $\pm$ SD                    | 3.3 $\pm$ 2.1 | 2.4 $\pm$ 1.8 | 2.2 $\pm$ 1.7 | .005*    | .423     | .001*    | b                |



**Table S-7: Cluster-associated development of mood**

| Time point                      | CURP<br>(n = 46) |            |            | CERP<br>(n = 36) |            |            | CURP<br>t1 vs<br>CERP<br>t1 | CURP<br>t2 vs<br>CERP<br>t2 | CURP<br>t3 vs<br>CERP<br>t3 | CURP<br>t1 vs<br>CURP<br>t3 | CURP<br>t2 vs<br>CURP<br>t3 | CERP<br>t1 vs<br>CERP<br>t3 | CERP<br>t2 vs<br>CERP<br>t3 |
|---------------------------------|------------------|------------|------------|------------------|------------|------------|-----------------------------|-----------------------------|-----------------------------|-----------------------------|-----------------------------|-----------------------------|-----------------------------|
|                                 | t1               | t2         | t3         | t1               | t2         | t3         |                             |                             |                             |                             |                             |                             |                             |
| Worried before endoscopy, n (%) | 43               |            | 32         | 35               |            | 28         | p                           |                             |                             |                             |                             |                             |                             |
| Worried                         | 30<br>(70)       | --         | 24<br>(75) | 12<br>(34)       | --         | 9<br>(32)  | .002*                       |                             | .001*                       | .048*                       |                             | .184                        |                             |
| Not worried                     | 13<br>(30)       | --         | 8<br>(25)  | 23<br>(66)       | --         | 19<br>(68) |                             |                             |                             |                             |                             |                             |                             |
| Mood before endoscopy, n (%)    | 42               |            |            |                  |            |            |                             |                             |                             |                             |                             |                             |                             |
| More depressed/anxious          | 12<br>(29)       | --         | 14<br>(44) | 23<br>(66)       | --         | 17<br>(61) | .001*                       |                             | .19                         | .041*                       |                             | .175                        |                             |
| More confident/cheerful         | 30<br>(71)       | --         | 18<br>(56) | 12<br>(34)       | --         | 11<br>(39) |                             |                             |                             |                             |                             |                             |                             |
| Mood after endoscopy, n (%)     |                  | 42         |            |                  | 36         |            |                             |                             |                             |                             |                             |                             |                             |
| More depressed/anxious          | --               | 22<br>(52) | 18<br>(56) | --               | 12<br>(33) | 9<br>(32)  |                             | .091                        | .061                        |                             | .074                        |                             | .13                         |
| More confident/cheerful         | --               | 20<br>(48) | 14<br>(44) | --               | 24<br>(67) | 19<br>(68) |                             |                             |                             |                             |                             |                             |                             |

**Cluster-associated development of feelings. CURP:** cluster of uneasy reaction pattern, **CERP:** cluster of euphoric reaction pattern, \* significant with  $p < 0.05$ , **a:**  $\chi^2$  test, **b:** t-test. Worry and the perception of depression /anxiousness and confidence /cheerfulness were asked before, immediately and during recall one week after endoscopy. Furthermore, the reminiscence of the perception was requested immediately and during recall one week after endoscopy. Patients had to remember how they felt before and after endoscopy. About two-thirds of CURP patients were worried before endoscopy; in CERP patients, it was vice versa. A total of 71 % of CURP patients felt more confident and cheerful, but only 56 % remembered their confidence and cheerfulness adequately during recall. Immediately after endoscopy, 48 % of CURP patients still felt more confident/cheerful; during recall, this perception was remembered adequately. However, no such effects were seen in CERP patients; they more often felt more depressed/anxious before, but more often confident/cheerful after endoscopy. Subsequently, CERP patients estimated their mood adequately.

**Table S-8: Correlations and interrelationships between emotional traits**

|                     | buoyant           | gleeful           | happy             | cheerful          | optimistic        | easygoing         | relaxed           | well-balanced     | in a chilled manner | calm              | High-spirited     | active            | powerful          | overexcited       | talkative | muddled           | wooz y            | limp             | inattentive       | slow ed down | worried           | concerned | anxious | excited |
|---------------------|-------------------|-------------------|-------------------|-------------------|-------------------|-------------------|-------------------|-------------------|---------------------|-------------------|-------------------|-------------------|-------------------|-------------------|-----------|-------------------|-------------------|------------------|-------------------|--------------|-------------------|-----------|---------|---------|
| buoyant             |                   |                   |                   |                   |                   |                   |                   |                   |                     |                   |                   |                   |                   |                   |           |                   |                   |                  |                   |              |                   |           |         |         |
| gleeful             | <b>0.54</b><br>** |                   |                   |                   |                   |                   |                   |                   |                     |                   |                   |                   |                   |                   |           |                   |                   |                  |                   |              |                   |           |         |         |
| happy               | <b>0.48</b><br>** | <b>0.75</b><br>** |                   |                   |                   |                   |                   |                   |                     |                   |                   |                   |                   |                   |           |                   |                   |                  |                   |              |                   |           |         |         |
| cheerful            | <b>0.56</b><br>** | <b>0.71</b><br>** | <b>0.73</b><br>** |                   |                   |                   |                   |                   |                     |                   |                   |                   |                   |                   |           |                   |                   |                  |                   |              |                   |           |         |         |
| optimistic          | 0.21              | <b>0.42</b><br>** | <b>0.49</b><br>** | <b>0.47</b><br>** |                   |                   |                   |                   |                     |                   |                   |                   |                   |                   |           |                   |                   |                  |                   |              |                   |           |         |         |
| easygoing           | <b>0.49</b><br>** | <b>0.29</b><br>** | <b>0.35</b><br>** | <b>0.48</b><br>** | <b>0.38</b><br>** |                   |                   |                   |                     |                   |                   |                   |                   |                   |           |                   |                   |                  |                   |              |                   |           |         |         |
| relaxed             | <b>0.32</b><br>** | <b>0.42</b><br>** | <b>0.48</b><br>** | <b>0.59</b><br>** | <b>0.36</b><br>** | <b>0.35</b><br>** |                   |                   |                     |                   |                   |                   |                   |                   |           |                   |                   |                  |                   |              |                   |           |         |         |
| well-balanced       | <b>0.34</b><br>** | <b>0.41</b><br>** | <b>0.53</b><br>** | <b>0.58</b><br>** | <b>0.54</b><br>** | <b>0.55</b><br>** | <b>0.70</b><br>** |                   |                     |                   |                   |                   |                   |                   |           |                   |                   |                  |                   |              |                   |           |         |         |
| in a chilled manner | <b>0.59</b><br>** | <b>0.57</b><br>** | <b>0.54</b><br>** | <b>0.78</b><br>** | <b>0.46</b><br>** | <b>0.50</b><br>** | <b>0.54</b><br>** | <b>0.63</b><br>** |                     |                   |                   |                   |                   |                   |           |                   |                   |                  |                   |              |                   |           |         |         |
| calm                | <b>0.41</b><br>** | <b>0.38</b><br>** | <b>0.29</b><br>** | <b>0.48</b><br>** | <b>0.34</b><br>** | <b>0.38</b><br>** | <b>0.50</b><br>** | <b>0.50</b><br>** | <b>0.51</b><br>**   |                   |                   |                   |                   |                   |           |                   |                   |                  |                   |              |                   |           |         |         |
| High-spirited       | <b>0.49</b><br>** | <b>0.61</b><br>** | <b>0.51</b><br>** | <b>0.60</b><br>** | <b>0.31</b><br>** | <b>0.48</b><br>** | <b>0.38</b><br>** | <b>0.46</b><br>** | <b>0.53</b><br>**   | <b>0.30</b><br>** |                   |                   |                   |                   |           |                   |                   |                  |                   |              |                   |           |         |         |
| active              | <b>0.41</b><br>** | <b>0.63</b><br>** | <b>0.67</b><br>** | <b>0.63</b><br>** | <b>0.47</b><br>** | <b>0.22</b><br>*  | <b>0.41</b><br>** | <b>0.42</b><br>** | <b>0.60</b><br>**   | <b>0.29</b><br>** | <b>0.57</b><br>** |                   |                   |                   |           |                   |                   |                  |                   |              |                   |           |         |         |
| powerful            | <b>0.42</b><br>** | <b>0.56</b><br>** | <b>0.58</b><br>** | <b>0.64</b><br>** | <b>0.41</b><br>** | <b>0.33</b><br>** | <b>0.42</b><br>** | <b>0.49</b><br>** | <b>0.54</b><br>**   | <b>0.33</b><br>** | <b>0.61</b><br>** | <b>0.74</b><br>** |                   |                   |           |                   |                   |                  |                   |              |                   |           |         |         |
| overexcited         | 0.12              | <b>0.28</b><br>*  | <b>0.23</b><br>*  | <b>0.26</b><br>*  | 0.18              | -0.01             | -0.01             | 0.06              | 0.22                | 0.00              | 0.17              | <b>0.26</b><br>*  | <b>0.22</b><br>*  |                   |           |                   |                   |                  |                   |              |                   |           |         |         |
| talkative           | <b>0.30</b><br>** | <b>0.50</b><br>** | <b>0.47</b><br>** | <b>0.45</b><br>** | <b>0.31</b><br>** | <b>0.24</b><br>*  | <b>0.31</b><br>** | <b>0.38</b><br>** | <b>0.32</b><br>**   | <b>0.47</b><br>** | <b>0.37</b><br>** | <b>0.48</b><br>** | <b>0.34</b><br>** | <b>0.28</b><br>** |           |                   |                   |                  |                   |              |                   |           |         |         |
| muddled             | 0.00              | 0.06              | 0.04              | -0.09             | 0.10              | -0.03             | 0.05              | 0.06              | 0.03                | -0.07             | -0.13             | 0.04              | -0.07             | 0.17              | 0.05      |                   |                   |                  |                   |              |                   |           |         |         |
| wooz y              | -0.20             | -0.06             | -0.13             | -0.21             | -0.02             | -0.19             | <b>0.26</b><br>*  | -0.20             | -0.18               | -0.10             | <b>0.25</b><br>** | -0.11             | <b>0.34</b><br>** | 0.15              | 0.15      | <b>0.53</b><br>** |                   |                  |                   |              |                   |           |         |         |
| limp                | -0.14             | -0.14             | -0.11             | -0.24<br>*        | <b>0.25</b><br>*  | 0.00              | -0.15             | -0.13             | -0.15               | -0.13             | <b>0.28</b><br>*  | <b>0.34</b><br>** | <b>0.52</b><br>** | -0.03             | -0.06     | 0.10              | 0.20              |                  |                   |              |                   |           |         |         |
| inattentive         | 0.03              | 0.09              | 0.02              | -0.07             | -0.05             | -0.10             | -0.16             | 0.01              | 0.03                | -0.16             | -0.07             | 0.07              | -0.07             | <b>0.33</b><br>** | 0.04      | <b>0.43</b><br>** | 0.18              | 0.20             |                   |              |                   |           |         |         |
| slow ed down        | -0.06             | -0.08             | -0.02             | -0.08             | -0.02             | 0.02              | 0.15              | 0.16              | -0.05               | 0.05              | <b>0.26</b><br>*  | -0.09             | -0.14             | 0.10              | 0.00      | <b>0.45</b><br>** | 0.22              | 0.17             | <b>0.38</b><br>** |              |                   |           |         |         |
| worried             | -0.10             | -0.16             | -0.10             | <b>0.26</b><br>*  | -0.15             | <b>0.35</b><br>** | <b>0.35</b><br>** | <b>0.23</b><br>*  | -0.06               | <b>0.33</b><br>** | -0.17             | -0.05             | -0.12             | 0.15              | -0.10     | 0.15              | 0.10              | 0.15             | <b>0.26</b><br>*  | -0.06        |                   |           |         |         |
| concerned           | -0.16             | -0.19             | -0.17             | -0.38<br>**       | -0.18             | <b>0.30</b><br>** | <b>0.42</b><br>** | <b>0.34</b><br>** | -0.18               | <b>0.48</b><br>** | <b>0.25</b><br>*  | -0.06             | <b>0.26</b><br>*  | 0.02              | -0.13     | <b>0.25</b><br>*  | <b>0.30</b><br>** | <b>0.25</b><br>* | <b>0.26</b><br>*  | -0.05        | <b>0.66</b><br>** |           |         |         |

|             |       |         |        |        |       |        |        |        |        |        |        |       |       |      |       |      |       |       |        |       |        |        |        |        |
|-------------|-------|---------|--------|--------|-------|--------|--------|--------|--------|--------|--------|-------|-------|------|-------|------|-------|-------|--------|-------|--------|--------|--------|--------|
| anxious     | -0.12 | -0.30** | 0.30** | 0.41** | 0.24* | 0.44** | 0.45** | 0.35** | 0.30** | 0.35** | 0.29** | -0.16 | 0.24* | 0.17 | -0.07 | 0.19 | 0.26* | 0.26* | 0.29** | 0.06  | 0.55** | 0.62** |        |        |
| overexcited | -0.08 | 0.29**  | -0.20  | 0.34** | -0.12 | -0.21  | 0.49** | 0.30** | 0.27*  | 0.50** | -0.21  | -0.15 | -0.17 | 0.10 | -0.21 | 0.06 | -0.01 | 0.11  | 0.32** | -0.04 | 0.64** | 0.59** | 0.60** |        |
| nervous     | -0.08 | 0.38**  | 0.26*  | 0.40** | -0.17 | 0.25*  | 0.40** | 0.26*  | 0.28*  | 0.44** | 0.30** | -0.14 | -0.15 | 0.07 | 0.23* | 0.08 | 0.01  | 0.06  | 0.35** | 0.09  | 0.65** | 0.57** | 0.59** | 0.80** |

The correlation coefficients describe the interrelationship between all adjectives. The level of significance is marked with asterisks (\* =  $p < 0.05$ , \*\* =  $p < 0.01$ ).

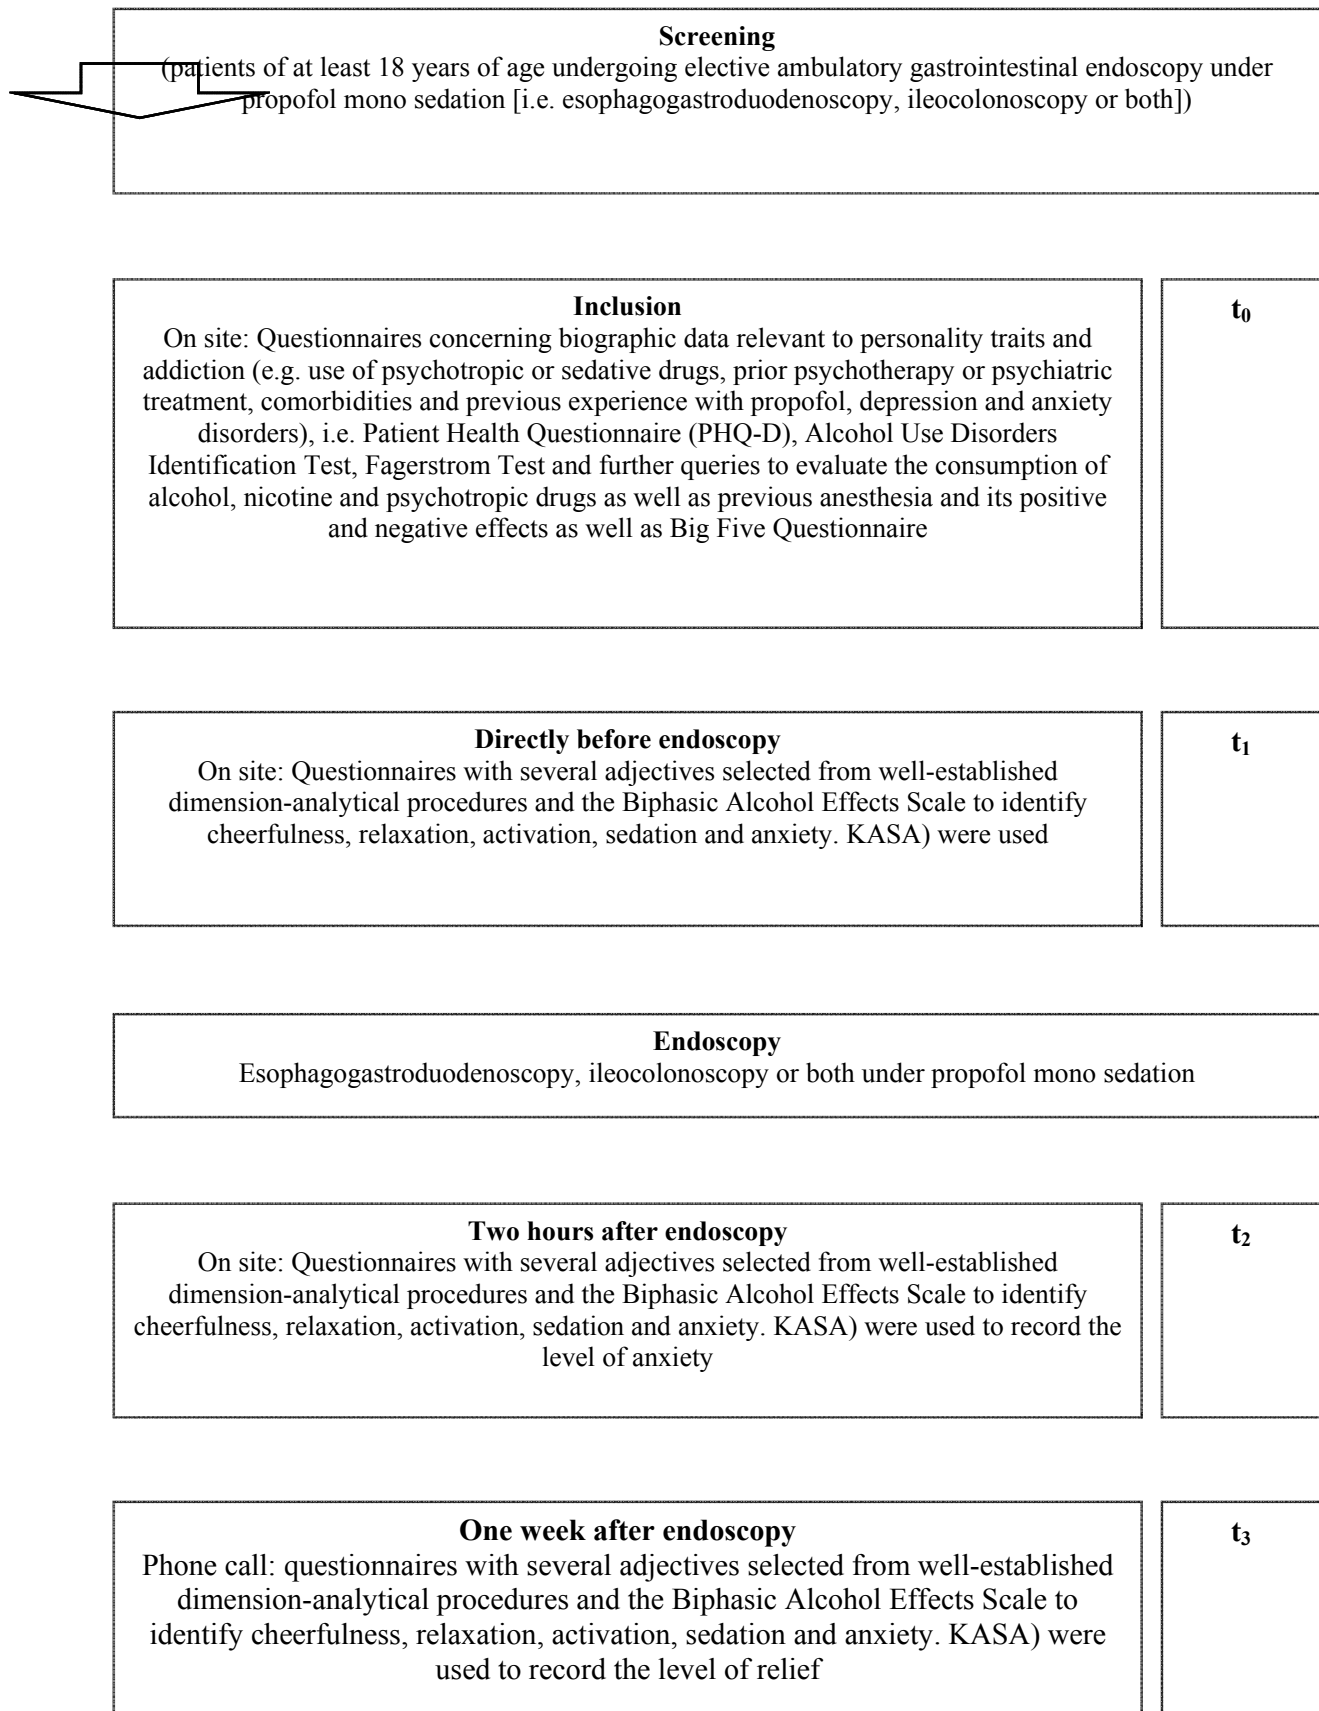

**Figure S-1:** Clinical trial protocol
